# Supplementary material for: A Systematic Review and Meta-Analysis of Depression and Protein–Energy Wasting in Kidney Disease
Source: PubMed Central journal article supplement — Kidney Int Rep. 2019 Dec 21;5(3):318–30. doi: 10.1016/j.ekir.2019.12.009 (PMC7056860; doi:10.1016/j.ekir.2019.12.009), 2019-12-21
Supplement: mmc1.pdf [file mmc1.pdf]

# Supplementary Figure S1

## A. Albumin

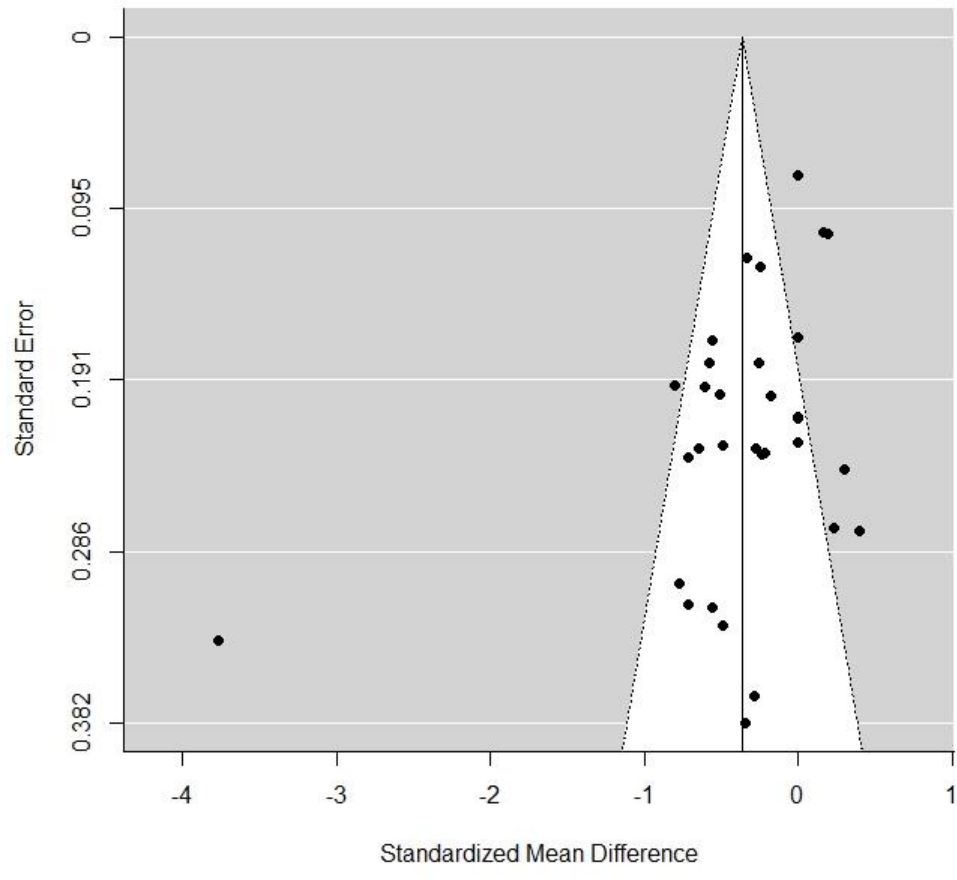

Test of funnel plot asymmetry  $P=0.34$

## B. CRP

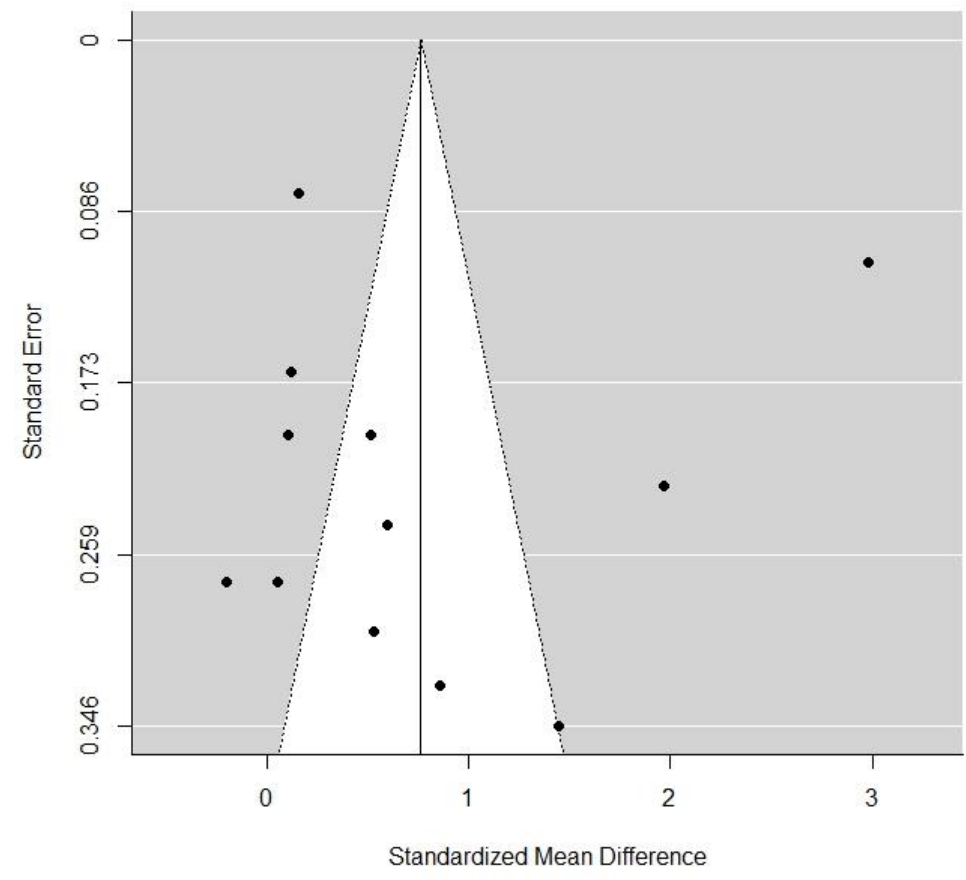

Test of funnel plot asymmetry  $P=0.25$

## C. hsCRP

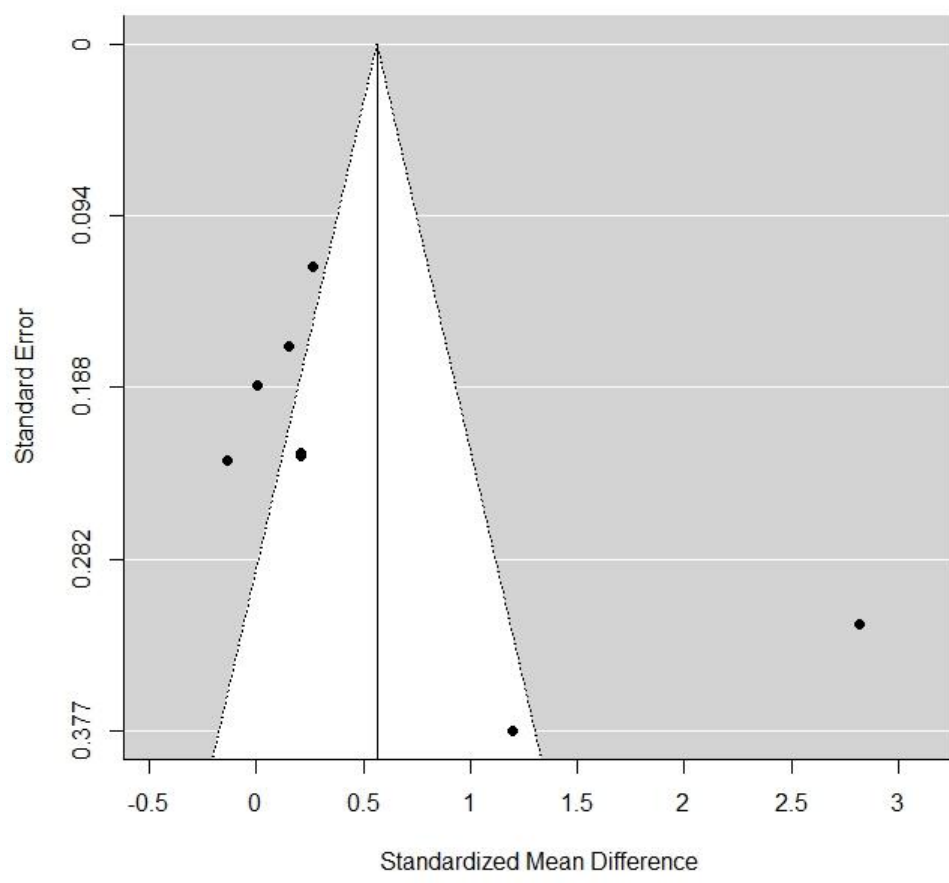

Test of funnel plot asymmetry  $P=0.28$

## D. IL-6

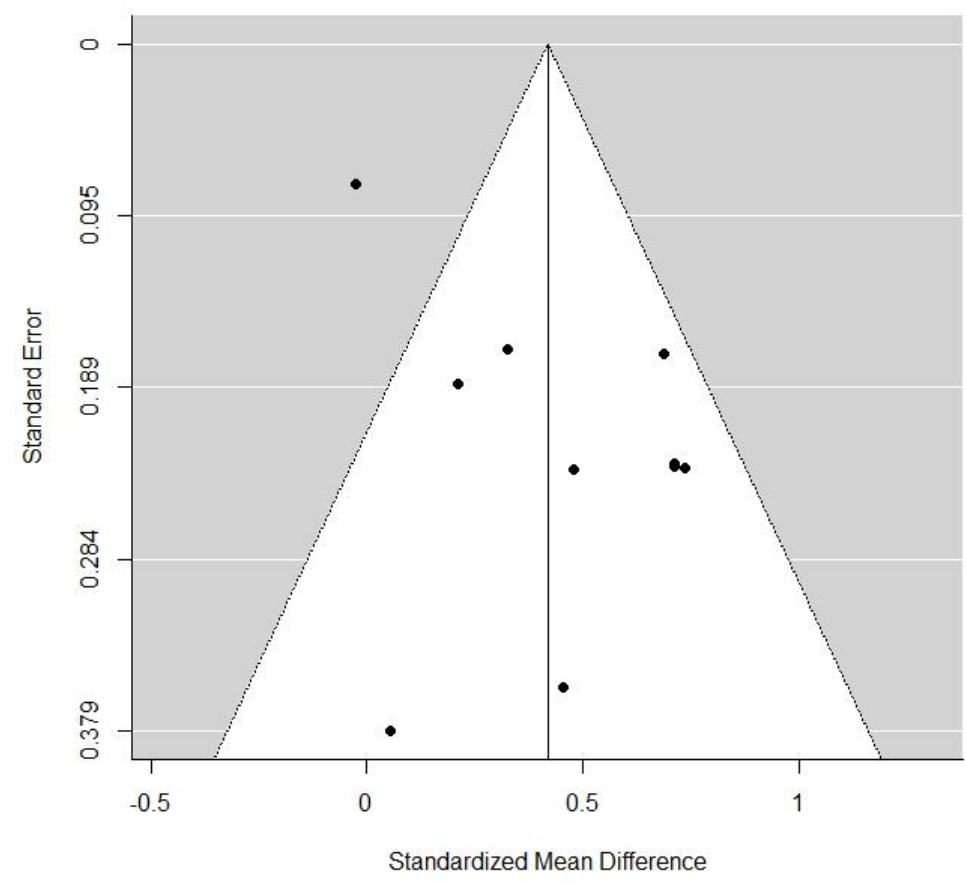

Test of funnel plot asymmetry  $P=0.99$

## E. TNF- $\alpha$

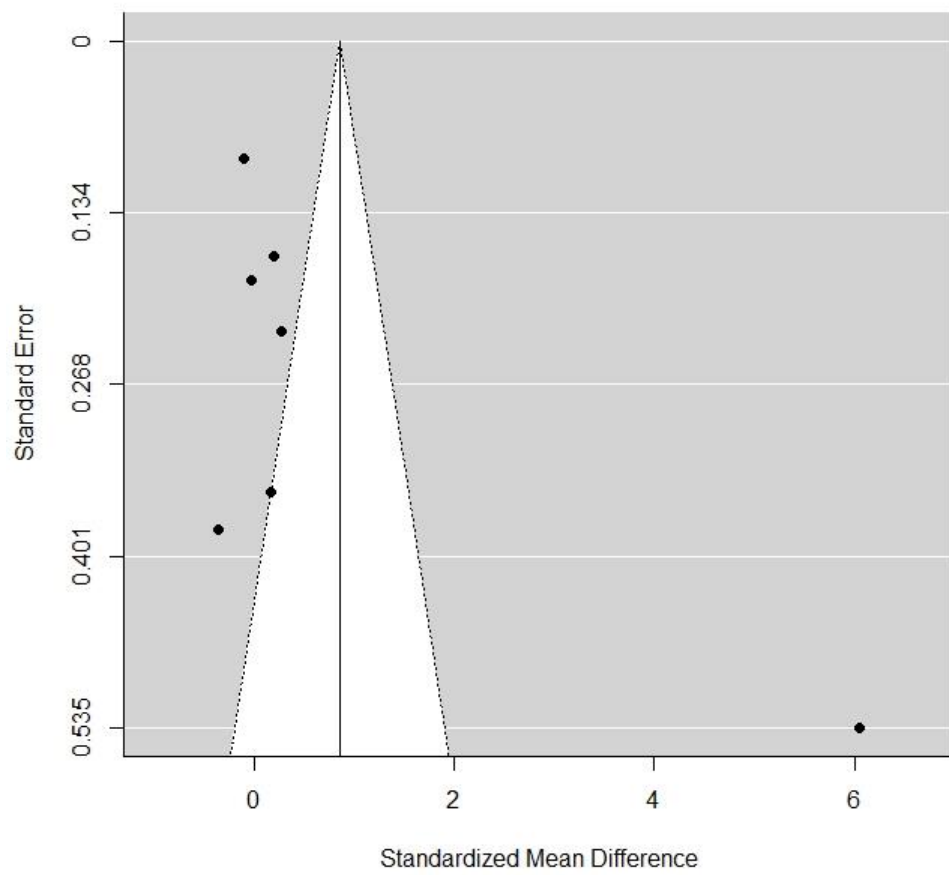

Test of funnel plot asymmetry  $P=0.38$

## F. IL-1

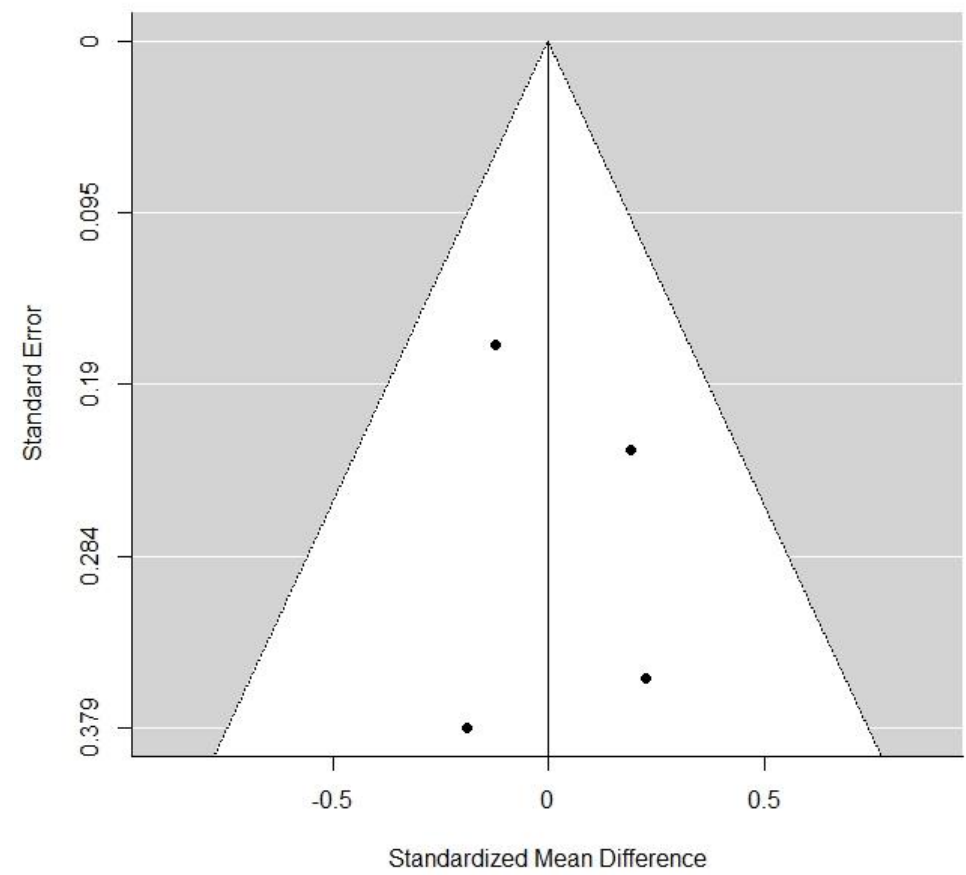

Test of funnel plot asymmetry  $P=0.99$

**Supplementary Table S1. Underlying data used for comparisons of inflammatory biomarkers in CKD or ESKD samples with vs. without depression, presented as mean (SD)**

| Study                                      | Albumin, g/dL |               | CRP, mg/L     |               | hsCRP, mg/dL |               | IL-6, pg/mL    |                | TNF- $\alpha$ , pg/mL |                 | IL-1, pg/mL     |                 |
|--------------------------------------------|---------------|---------------|---------------|---------------|--------------|---------------|----------------|----------------|-----------------------|-----------------|-----------------|-----------------|
|                                            | Depression    | No depression | Depression    | No depression | Depression   | No depression | Depression     | No depression  | Depression            | No depression   | Depression      | No depression   |
| Dogan <i>et al.</i> <sup>26</sup>          | 3.5 (0.6)     | 3.9 (0.5)     | 107 (46)      | 45 (38)       |              |               |                |                |                       |                 |                 |                 |
| Kalender <i>et al.</i> <sup>27</sup>       | 3.48 (0.56)   | 3.75 (0.51)   | 15.2 (27.2)   | 6.2 (12.9)    |              |               |                |                |                       |                 |                 |                 |
| Micozkadioglu <i>et al.</i> <sup>28</sup>  | 3.88 (0.42)   | 3.95 (0.34)   | 11.82 (18.85) | 10.00 (14.90) |              |               |                |                |                       |                 |                 |                 |
| Boulware <i>et al.</i> <sup>29</sup>       | 3.6 (0.4)     | 3.6 (0.4)     | 94 (132)      | 76 (108)      |              |               | 7.1 (9.3)      | 7.4 (11.8)     |                       |                 |                 |                 |
| Kalender <i>et al.</i> <sup>30</sup>       |               |               |               |               | 1.19 (1.08)  | 0.44 (0.34)   | 189.75 (76.48) | 165.15 (42.39) | 67.38 (71.97)         | 60.80 (11.44)   | 50.63 (12.91)   | 48.09 (10.28)   |
| Simic Ogrizovic <i>et al.</i> <sup>9</sup> | 3.54 (0.5)    | 3.79 (0.36)   |               |               |              |               |                |                |                       |                 |                 |                 |
| Hsu <i>et al.</i> <sup>31</sup>            | 3.6 (0.5)     | 3.9 (0.3)     | 15.2 (23.5)   | 7.0 (7.9)     |              |               |                |                |                       |                 |                 |                 |
| Montinaro <i>et al.</i> <sup>32</sup>      | 3.45 (0.32)   | 3.56 (0.29)   |               |               |              |               |                |                |                       |                 |                 |                 |
| Bossola <i>et al.</i> <sup>33</sup>        | 4.0 (0.2)     | 4.1 (0.2)     |               |               | 6.8 (4.8)    | 5.9 (3.7)     | 4.2 (3.5)      | 2.1 (2.1)      |                       |                 |                 |                 |
| Ko <i>et al.</i> <sup>34</sup>             | 3.6 (0.5)     | 3.9 (0.4)     |               |               | 6.7 (1.1)    | 3.7 (1.0)     |                |                | 3.7 (0.6)             | 0.9 (0.2)       |                 |                 |
| Gyاملani <i>et al.</i> <sup>35</sup>       | 3.7 (0.5)     | 3.6 (0.4)     | 0.52 (0.96)   | 0.49 (0.41)   |              |               |                |                |                       |                 |                 |                 |
| Li <i>et al.</i> <sup>36</sup>             | 3.663 (0.424) | 3.964 (0.511) | 21.89 (19.55) | 2.01 (1.89)   |              |               |                |                |                       |                 |                 |                 |
| Hung <i>et al.</i> <sup>37</sup>           | 3.7 (0.3)     | 3.9 (0.4)     |               |               | 0.74 (0.96)  | 0.61 (0.73)   | 8.00 (1.55)    | 6.89 (1.65)    |                       |                 |                 |                 |
| Chilcot <i>et al.</i> <sup>38</sup>        | 3.46 (0.62)   | 3.60 (0.51)   |               |               |              |               |                |                |                       |                 |                 |                 |
| Bornivelli <i>et al.</i> <sup>39</sup>     | 3.73 (0.38)   | 3.90 (0.24)   | 18.2 (17.3)   | 8.3 (6)       |              |               |                |                |                       |                 |                 |                 |
| Armaly <i>et al.</i> <sup>40</sup>         | 3.69 (0.3)    | 3.52 (0.7)    | 76.3 (95.7)   | 32.1 (49.8)   |              |               |                |                |                       |                 |                 |                 |
| Kim <i>et al.</i> <sup>41</sup>            | 3.7 (0.3)     | 3.8 (0.4)     |               |               |              |               |                |                |                       |                 |                 |                 |
| Cilan <i>et al.</i> <sup>42</sup>          |               |               |               |               |              |               | 143.78 (85.84) | 139.09 (83.25) | 109.22 (260.15)       | 214.94 (303.69) | 135.89 (171.46) | 177.00 (222.79) |
| Wang <i>et al.</i> <sup>43</sup>           | 3.8 (0.4)     | 3.8 (0.4)     | 10.3 (25.6)   | 8.3 (13.3)    |              |               | 4.2 (4.9)      | 3.1 (2.7)      | 20.8 (93)             | 9.5 (40)        | 1.3 (1.1)       | 1.4 (0.7)       |
| Taraz <i>et al.</i> <sup>44</sup>          | 4.5 (0.7)     | 4.5 (0.6)     |               |               | 5.26 (2.52)  | 4.78 (1.87)   | 7.3 (2.7)      | 5.3 (2.9)      | 10.9 (4.6)            | 9.6 (4.7)       | 11.3 (5.6)      | 10.3 (4.4)      |
| Su <i>et al.</i> <sup>45</sup>             | 3.8 (0.3)     | 3.9 (0.3)     |               |               | 0.91 (1.38)  | 0.58 (1.14)   |                |                |                       |                 |                 |                 |

|                                        |             |             |             |             |            |           |             |             |
|----------------------------------------|-------------|-------------|-------------|-------------|------------|-----------|-------------|-------------|
| Cilan <i>et al.</i> <sup>46</sup>      | 3.40 (0.60) | 3.55 (0.48) |             |             |            |           |             |             |
| Preljevic <i>et al.</i> <sup>47</sup>  | 3.79 (0.58) | 3.89 (0.41) |             |             |            |           |             |             |
| Nowak <i>et al.</i> <sup>48</sup>      |             |             | 14.3 (1.3)  | 11.1 (0.9)  |            |           |             |             |
| Knuth <i>et al.</i> <sup>49</sup>      | 3.8 (0.3)   | 3.9 (0.5)   |             |             | 1.9 (0.51) | 1.7 (0.3) |             |             |
| Fan <i>et al.</i> <sup>50</sup>        | 3.7 (0.4)   | 3.8 (0.4)   |             |             |            |           |             |             |
| Loosman <i>et al.</i> <sup>51</sup>    | 3.99 (0.51) | 3.99 (0.34) |             |             |            |           |             |             |
| Bossola <i>et al.</i> <sup>52</sup>    | 3.9 (0.3)   | 4.1 (0.2)   | 10.0 (9.9)  | 11.6 (16.5) | 4.9 (3.1)  | 2.8 (1.8) |             |             |
| Ekramzadeh <i>et al.</i> <sup>53</sup> | 4.27 (0.06) | 4.52 (0.08) |             |             |            |           |             |             |
| Gok Oguz <i>et al.</i> <sup>54</sup>   | 3.66 (0.45) | 3.85 (0.33) |             |             |            |           |             |             |
| Barros <i>et al.</i> <sup>55</sup>     | 4.0 (0.4)   | 4.0 (0.4)   |             |             |            |           |             |             |
| Haverkamp <i>et al.</i> <sup>56</sup>  |             |             |             |             |            |           | 20.6 (9)    | 21.9 (14)   |
| Jong <i>et al.</i> <sup>57</sup>       | 3.7 (0.3)   | 4.0 (0.4)   | 1.34 (1.30) | 1.33 (1.28) | 3.0 (0.8)  | 2.8 (1.0) | 0.82 (0.96) | 0.84 (0.96) |
| Chilcot <i>et al.</i> <sup>58</sup>    | 3.93 (0.43) | 3.85 (0.42) |             |             |            |           |             |             |

**Note:** The units used to report inflammatory biomarkers varied by study but were converted to uniform units of measure to maintain consistency across studies for each biomarker.

**Abbreviations:** CRP, C-reactive protein; hsCRP, high sensitivity C-reactive protein; IL, interleukin; TNF- $\alpha$ , tumor necrosis factor- $\alpha$ .

# Supplementary Figure S2

## A. Albumin

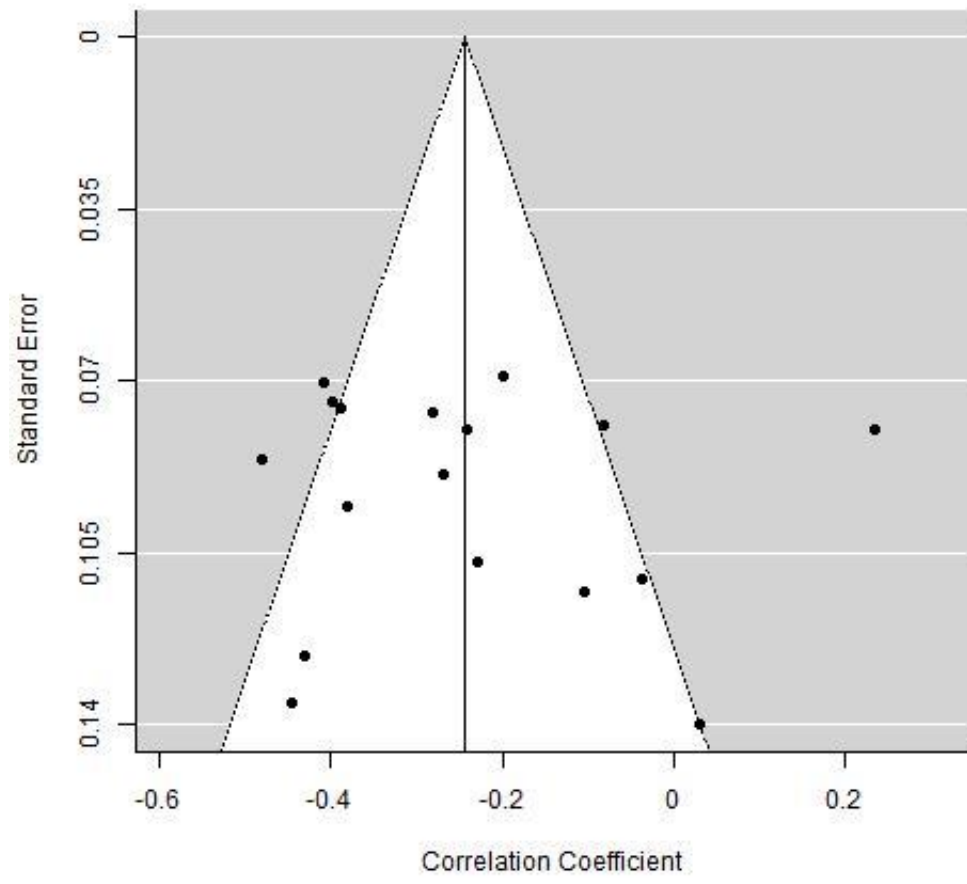

Test of funnel plot asymmetry  $P=0.87$

## B. CRP

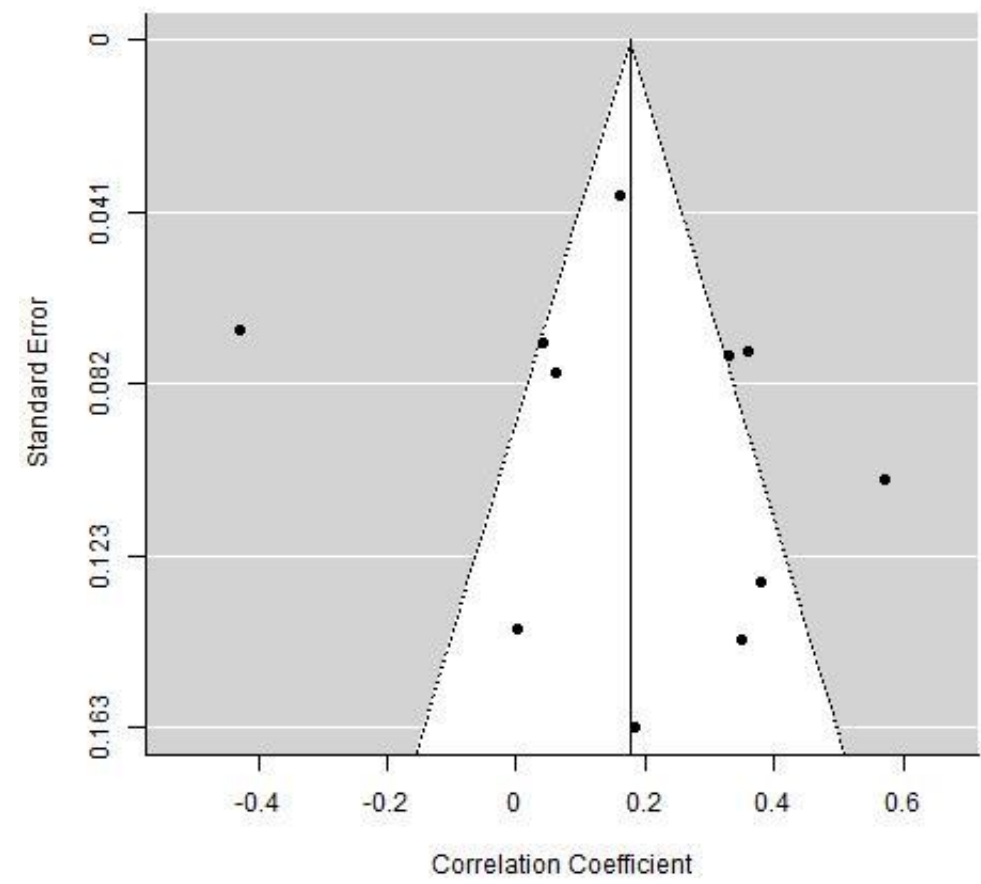

Test of funnel plot asymmetry  $P=0.35$

## C. hsCRP

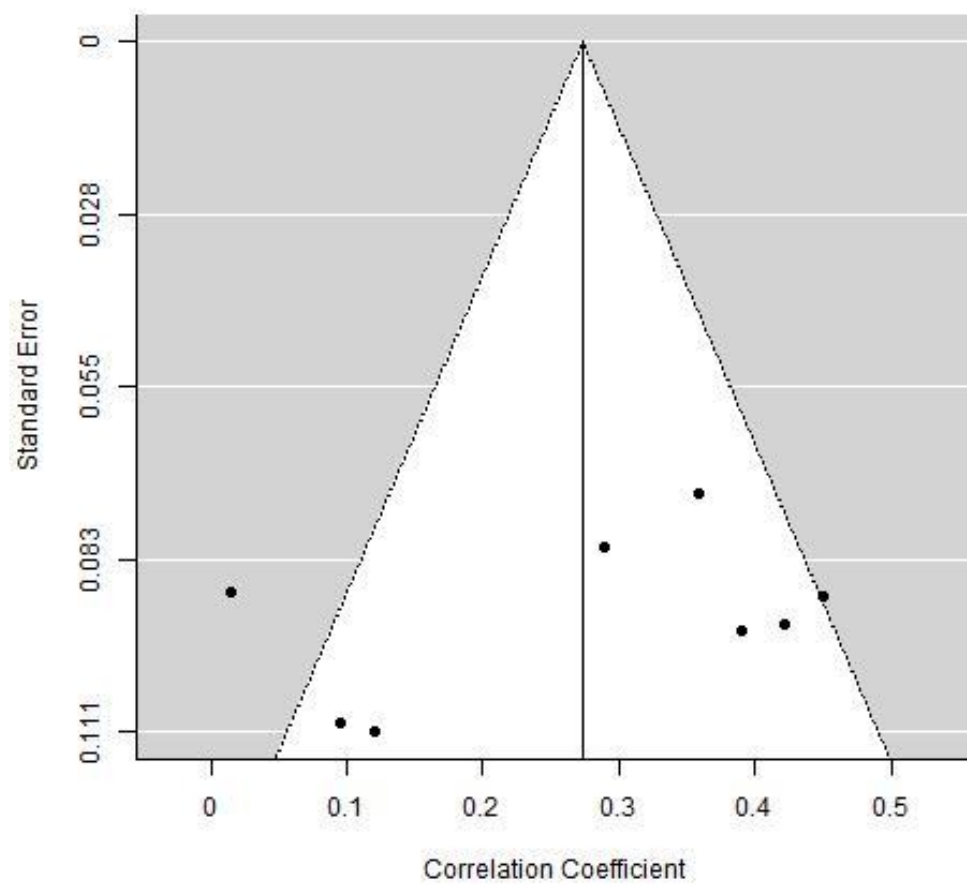

Test of funnel plot asymmetry  $P=0.38$

## D. IL-6

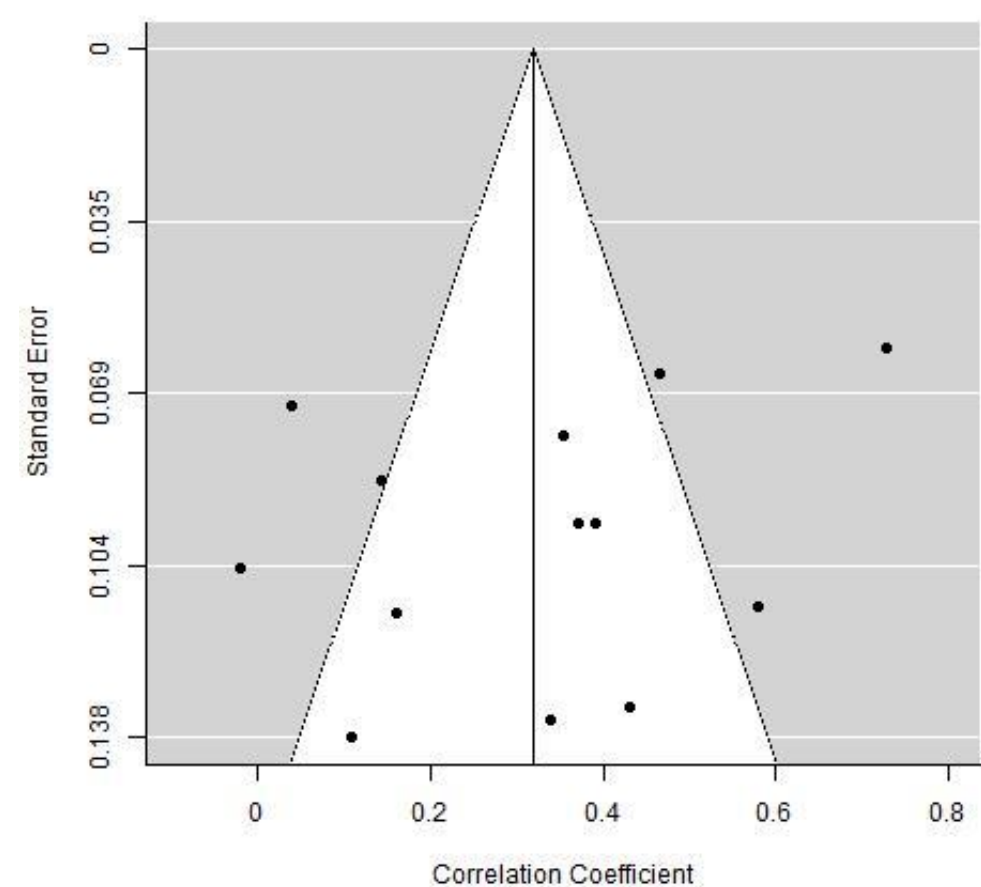

Test of funnel plot asymmetry  $P=0.20$

## E. TNF- $\alpha$

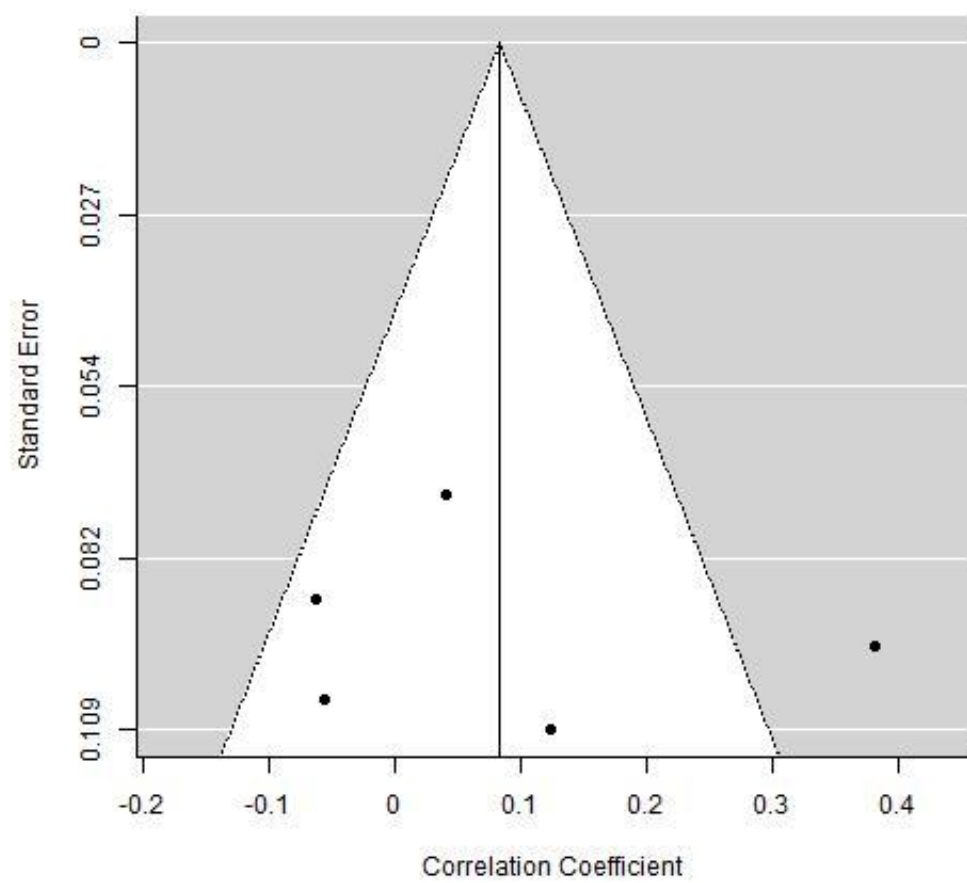

Test of funnel plot asymmetry  $P=0.23$

**Supplementary Figure S3.** Correlations of depressive symptoms, taken continuously, with **(A)** albumin, **(B)** CRP, **(C)** hsCRP, **(D)** IL-6, and **(E)** TNF- $\alpha$ .

**A. Albumin**

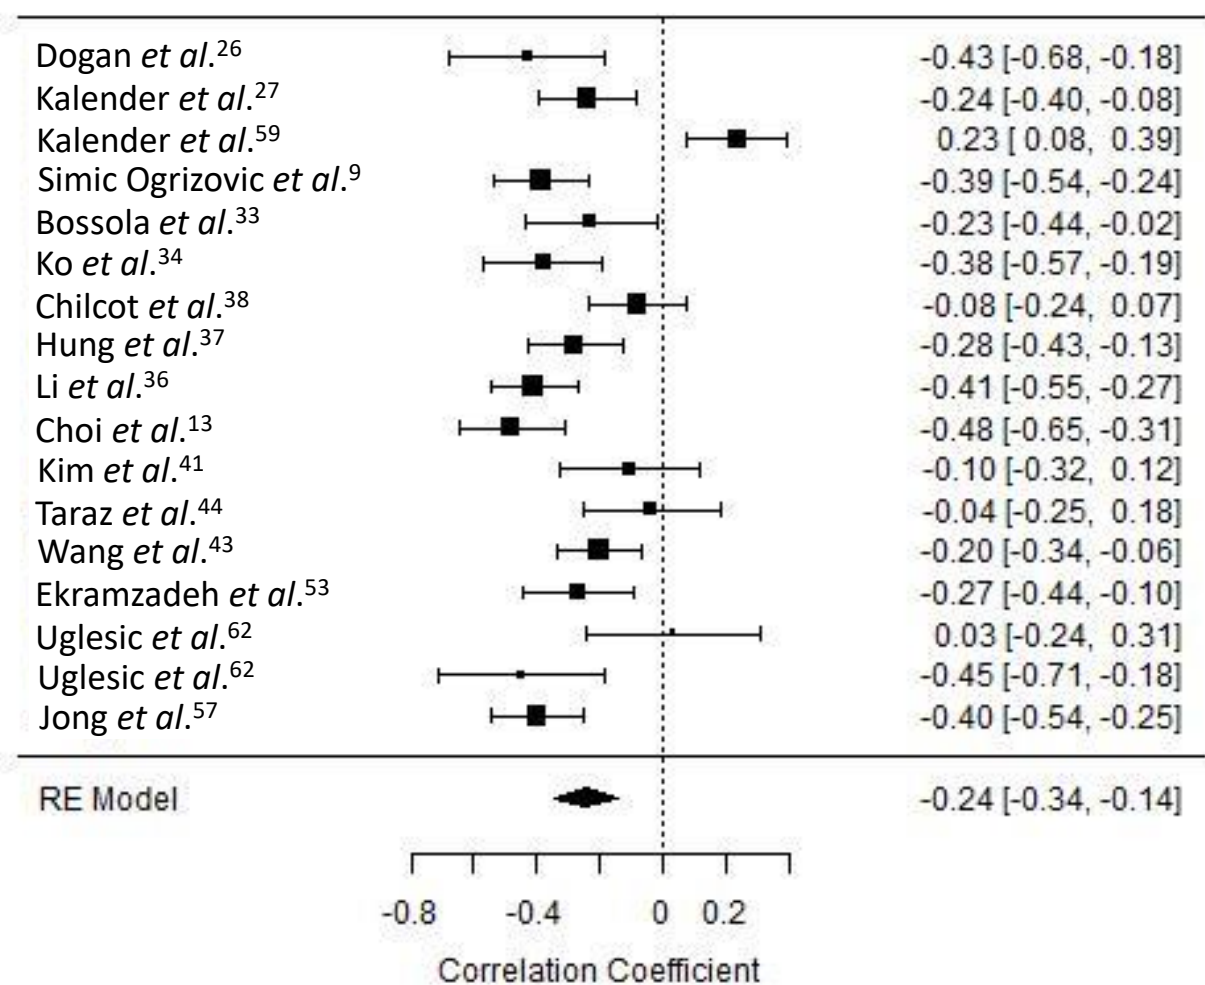

Heterogeneity:  $I^2$  (95% CI) = 79.13 (61.7, 91.1)  
 Publication bias: Test of funnel plot asymmetry  $P=0.31$

**B. CRP**

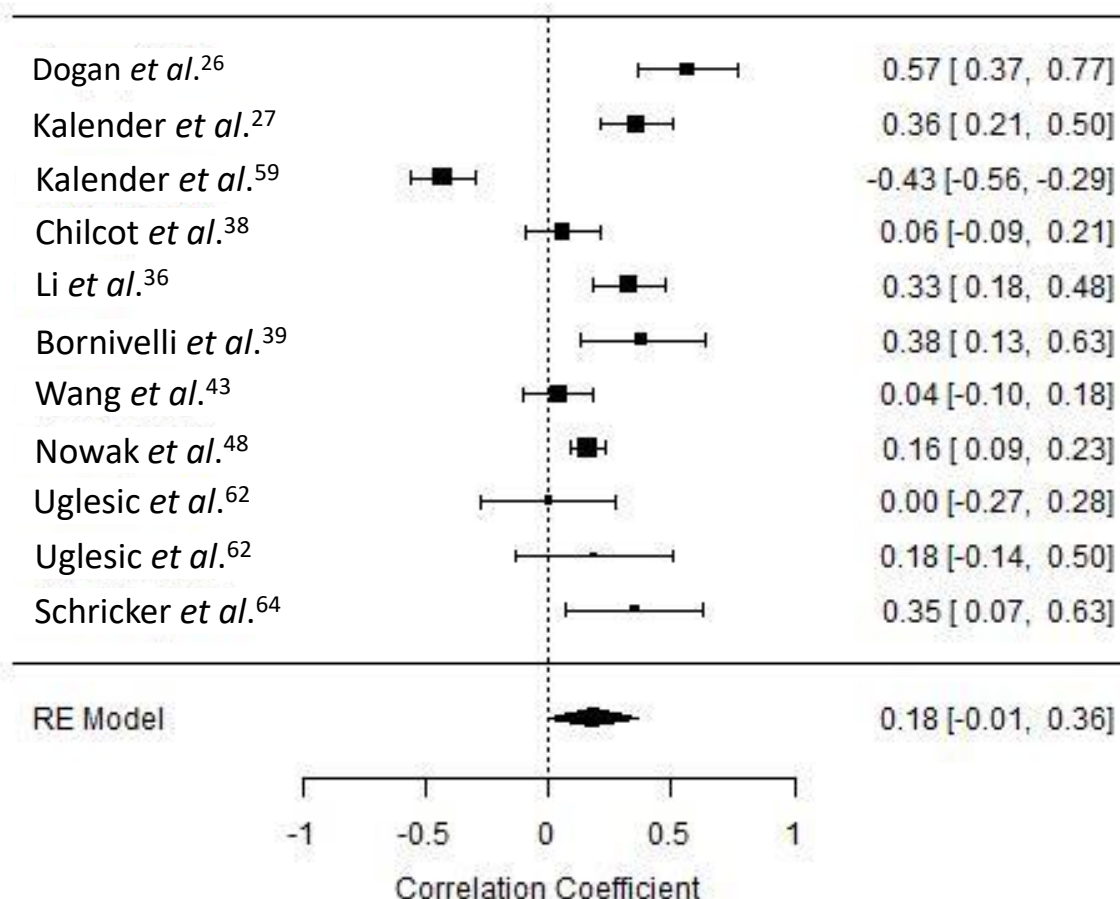

Heterogeneity:  $I^2$  (95% CI) = 91.2 (81.0, 97.1)  
 Publication bias: Test of funnel plot asymmetry  $P=0.65$

**C. hsCRP**

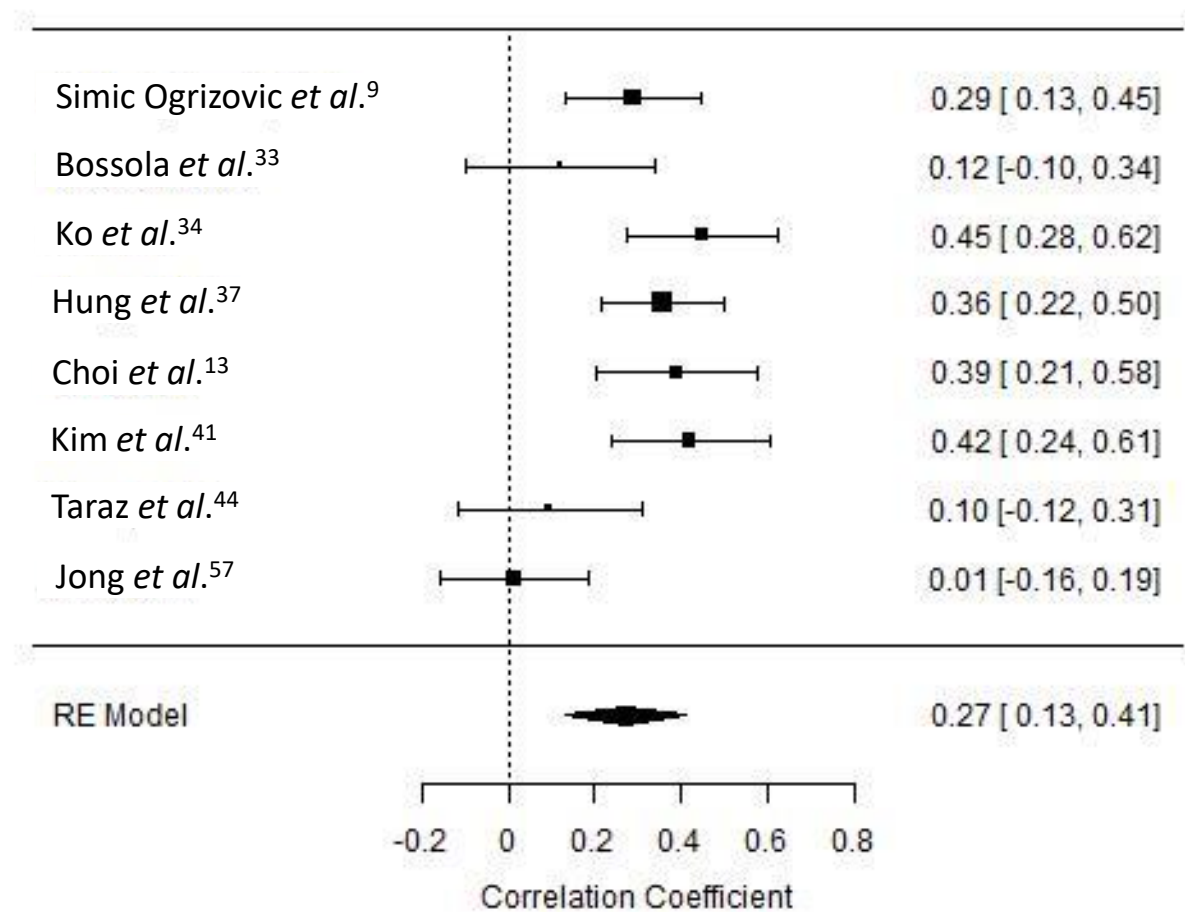

Heterogeneity:  $I^2$  (95% CI) = 69.5 (29.4, 92.9)  
 Publication bias: Test of funnel plot asymmetry  $P=0.72$

**D. IL-6**

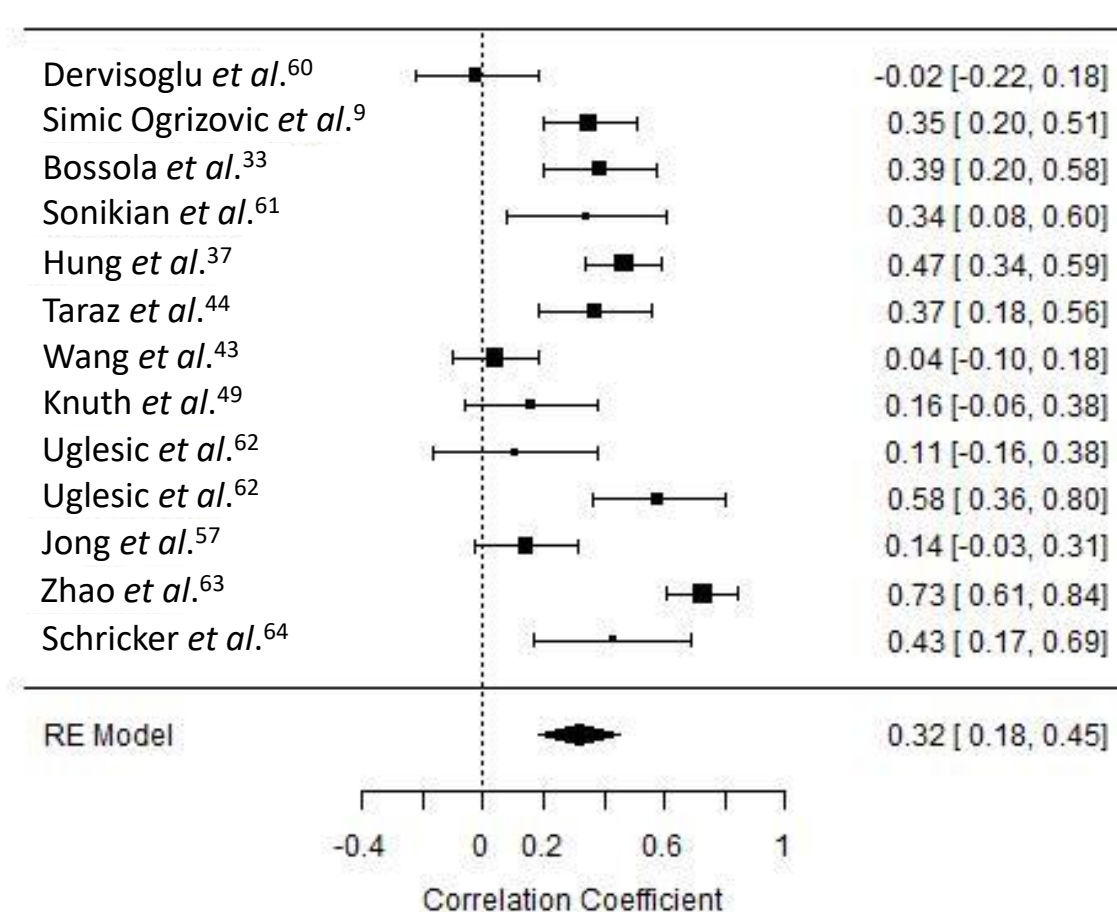

Heterogeneity:  $I^2$  (95% CI) = 83.7 (67.3, 93.7)  
 Publication bias: Test of funnel plot asymmetry  $P=0.59$

**E. TNF- $\alpha$**

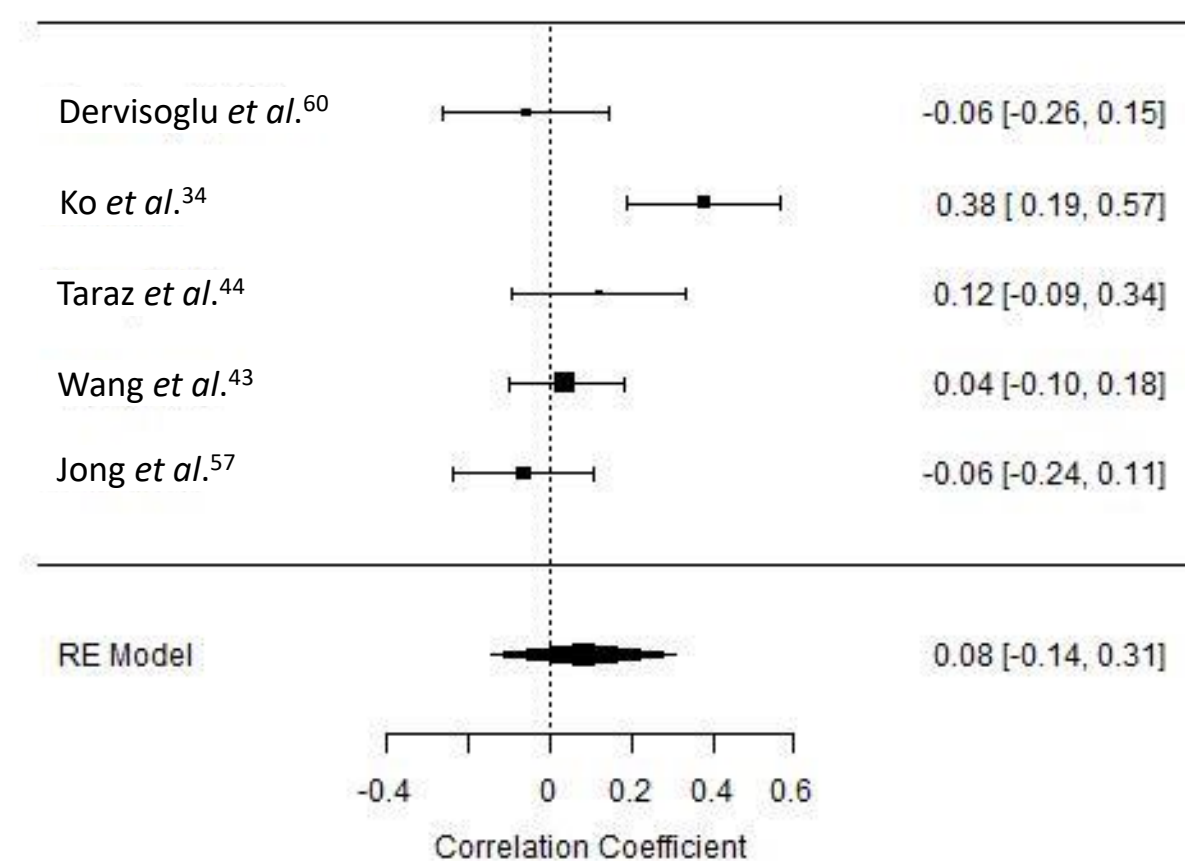

Heterogeneity:  $I^2$  (95% CI) = 73.7 (25.0, 96.9)  
 Publication bias: Test of funnel plot asymmetry  $P=0.82$

**Supplementary Table S2. Underlying data used for correlations of depression severity with inflammatory biomarkers in CKD and ESKD patients, presented as Spearman or Pearson rho**

|                                                   | Albumin | CRP    | hsCRP | IL-6  | TNF- $\alpha$ |
|---------------------------------------------------|---------|--------|-------|-------|---------------|
| Dogan <i>et al.</i> <sup>26</sup>                 | -0.43   | 0.57   |       |       |               |
| Kalender <i>et al.</i> <sup>27</sup>              | -0.241  | 0.358  |       |       |               |
| Kalender <i>et al.</i> <sup>59</sup>              | 0.234   | -0.428 |       |       |               |
| Dervisoglu <i>et al.</i> <sup>60</sup>            |         |        |       | -0.02 | -0.055        |
| Simic Ogrizovic <i>et al.</i> <sup>9</sup>        | -0.388  |        | 0.29  | 0.353 |               |
| Bossola <i>et al.</i> <sup>33</sup>               | -0.23   |        | 0.12  | 0.39  |               |
| Ko <i>et al.</i> <sup>34</sup>                    | -0.38   |        | 0.45  |       | 0.38          |
| Sonikian <i>et al.</i> <sup>61</sup>              |         |        |       | 0.34  |               |
| Chilcot <i>et al.</i> <sup>38</sup>               | -0.081  | 0.06   |       |       |               |
| Hung <i>et al.</i> <sup>37</sup>                  | -0.281  |        | 0.358 | 0.466 |               |
| Li <i>et al.</i> <sup>36</sup>                    | -0.409  | 0.33   |       |       |               |
| Choi <i>et al.</i> <sup>13</sup>                  | -0.48   |        | 0.391 |       |               |
| Kim <i>et al.</i> <sup>41</sup>                   | -0.104  |        | 0.422 |       |               |
| Taraz <i>et al.</i> <sup>44</sup>                 | -0.037  |        | 0.096 | 0.370 | 0.123         |
| Bornivelli <i>et al.</i> <sup>39</sup>            |         | 0.38   |       |       |               |
| Wang <i>et al.</i> <sup>43</sup>                  | -0.20   | 0.04   |       | 0.04  | 0.04          |
| Nowak <i>et al.</i> <sup>48</sup>                 |         | 0.162  |       |       |               |
| Knuth <i>et al.</i> <sup>49</sup>                 |         |        |       | 0.16  |               |
| Ekramzadeh <i>et al.</i> <sup>53</sup>            | -0.27   |        |       |       |               |
| Uglešić <i>et al.</i> , <sup>62</sup> HD patients | 0.031   | 0.003  |       | 0.109 |               |
| Uglešić <i>et al.</i> , <sup>62</sup> PD patients | -0.447  | 0.183  |       | 0.58  |               |
| Jong <i>et al.</i> <sup>57</sup>                  | -0.399  |        | 0.015 | 0.143 | -0.063        |
| Zhao <i>et al.</i> <sup>63</sup>                  |         |        |       | 0.727 |               |
| Schricker <i>et al.</i> <sup>64</sup>             |         | 0.35   |       | 0.43  |               |

**Abbreviations:** CRP, C-reactive protein; hsCRP, high sensitivity C-reactive protein; IL, interleukin; TNF- $\alpha$ , tumor necrosis factor- $\alpha$ .
